# Supplementary material
Source: PubMed Central journal article supplement (PMC3347130)
Supplement: supp_50.5.1524_JCM-JCM00111-12-s01.pdf [file supp_50.5.1524_JCM-JCM00111-12-s01.pdf]

1  
2  
3  
4  
5  
6  
7

Supplemental Data: Table S1A. Matching/mismatching of RF classification analysis of 39830 PFGE patterns (including G1 and G2) adjusted by NCTR fixed band method using Group 1 as the standard set of band classes. Two-fold cross validation was used with 100 repetitions.

| Serotype                        | 4,5,12:- | Agona | Braenderup | Enteritidis | Hadar | Heidelberg | Infantis | Javiana | Mississippi | Montevideo | Muenchen | Newport | Oranienburg | Paratyphi B var. L(+)-tartrate+ | Poona | Saintpaul | Thompson | Typhi | Typhimurium | Typhimurium var. 5- | Anatum | Bareilly | Berta | Derby | Hartford | Litchfield | Mbandaka | Panama | Paratyphi A | Schwarzengrund | Senftenberg | Stanley |       |   |
|---------------------------------|----------|-------|------------|-------------|-------|------------|----------|---------|-------------|------------|----------|---------|-------------|---------------------------------|-------|-----------|----------|-------|-------------|---------------------|--------|----------|-------|-------|----------|------------|----------|--------|-------------|----------------|-------------|---------|-------|---|
| 1,4,[5],12:-                    | 1710     | 0     | 0          | 0           | 0     | 0          | 0        | 0       | 0           | 0          | 1        | 0       | 0           | 0                               | 3     | 0         | 0        | 0     | 151         | 49                  | 0      | 1        | 0     | 0     | 0        | 0          | 0        | 0      | 0           | 0              | 0           | 0       | 1     |   |
| Agona                           | 0        | 1951  | 0          | 0           | 0     | 2          | 2        | 0       | 2           | 4          | 3        | 1       | 1           | 0                               | 2     | 3         | 1        | 0     | 0           | 1                   | 2      | 1        | 0     | 11    | 0        | 1          | 0        | 2      | 1           | 0              | 2           | 0       | 1     |   |
| Braenderup                      | 0        | 0     | 1846       | 1           | 0     | 0          | 0        | 0       | 0           | 0          | 0        | 0       | 0           | 1                               | 1     | 0         | 0        | 0     | 0           | 0                   | 0      | 1        | 1     | 0     | 0        | 1          | 0        | 0      | 0           | 1              | 0           | 1       |       |   |
| Enteritidis                     | 0        | 0     | 0          | 1837        | 1     | 0          | 0        | 0       | 0           | 0          | 0        | 0       | 1           | 0                               | 3     | 0         | 0        | 0     | 0           | 0                   | 0      | 0        | 0     | 0     | 0        | 0          | 0        | 0      | 0           | 0              | 0           | 0       | 0     |   |
| Hadar                           | 1        | 0     | 0          | 0           | 1815  | 0          | 0        | 0       | 0           | 0          | 2        | 0       | 0           | 0                               | 3     | 1         | 0        | 0     | 0           | 2                   | 0      | 4        | 0     | 0     | 0        | 0          | 0        | 2      | 0           | 0              | 0           | 0       | 0     |   |
| Heidelberg                      | 0        | 0     | 0          | 0           | 0     | 1919       | 0        | 0       | 0           | 0          | 0        | 0       | 0           | 0                               | 2     | 0         | 0        | 0     | 1           | 3                   | 1      | 0        | 0     | 0     | 0        | 0          | 0        | 1      | 0           | 1              | 2           | 0       | 0     |   |
| Infantis                        | 0        | 1     | 1          | 0           | 0     | 0          | 1839     | 0       | 1           | 1          | 7        | 4       | 0           | 1                               | 1     | 0         | 2        | 3     | 0           | 0                   | 8      | 0        | 3     | 3     | 0        | 0          | 0        | 0      | 0           | 0              | 1           | 0       | 1     | 0 |
| Javiana                         | 0        | 0     | 0          | 0           | 4     | 0          | 0        | 1791    | 1           | 0          | 0        | 0       | 1           | 0                               | 8     | 0         | 0        | 0     | 0           | 0                   | 2      | 0        | 0     | 0     | 0        | 0          | 11       | 0      | 0           | 0              | 1           | 1       | 0     |   |
| Mississippi                     | 0        | 0     | 0          | 0           | 2     | 0          | 0        | 0       | 1800        | 0          | 2        | 1       | 1           | 0                               | 6     | 0         | 0        | 0     | 1           | 0                   | 1      | 1        | 5     | 0     | 0        | 0          | 1        | 0      | 0           | 0              | 1           | 0       | 1     | 0 |
| Montevideo                      | 1        | 1     | 0          | 2           | 1     | 0          | 0        | 0       | 1           | 1870       | 0        | 0       | 3           | 1                               | 0     | 0         | 2        | 1     | 1           | 0                   | 0      | 1        | 0     | 2     | 1        | 0          | 0        | 0      | 0           | 0              | 0           | 1       | 1     | 0 |
| Muenchen                        | 0        | 0     | 1          | 0           | 2     | 0          | 1        | 0       | 3           | 1          | 1857     | 2       | 0           | 1                               | 3     | 1         | 1        | 0     | 0           | 0                   | 0      | 1        | 0     | 2     | 1        | 1          | 0        | 0      | 0           | 0              | 0           | 1       | 1     | 0 |
| Newport                         | 0        | 0     | 0          | 1           | 1     | 0          | 0        | 1       | 1           | 0          | 0        | 1815    | 1           | 2                               | 1     | 2         | 0        | 0     | 0           | 0                   | 0      | 4        | 0     | 0     | 0        | 1          | 1        | 0      | 0           | 3              | 1           | 1       | 0     |   |
| Oranienburg                     | 0        | 0     | 0          | 0           | 0     | 1          | 0        | 0       | 0           | 0          | 0        | 0       | 1939        | 0                               | 0     | 0         | 1        | 0     | 0           | 0                   | 0      | 0        | 0     | 0     | 0        | 1          | 0        | 0      | 0           | 0              | 0           | 0       | 0     |   |
| Paratyphi B var. L(+)-tartrate+ | 0        | 0     | 0          | 0           | 0     | 0          | 1        | 0       | 0           | 1          | 0        | 1       | 1814        | 2                               | 2     | 0         | 0        | 0     | 1           | 0                   | 6      | 2        | 0     | 0     | 0        | 0          | 0        | 1      | 1           | 0              | 0           | 8       | 0     |   |
| Poona                           | 1        | 0     | 0          | 0           | 5     | 0          | 0        | 3       | 2           | 0          | 0        | 0       | 0           | 0                               | 1809  | 0         | 0        | 1     | 1           | 1                   | 0      | 2        | 0     | 1     | 0        | 0          | 0        | 2      | 0           | 1              | 4           | 0       | 0     |   |
| Saintpaul                       | 0        | 0     | 0          | 0           | 1     | 1          | 0        | 0       | 0           | 0          | 0        | 0       | 3           | 0                               | 2     | 1881      | 0        | 0     | 1           | 2                   | 0      | 5        | 0     | 0     | 0        | 1          | 0        | 3      | 0           | 0              | 0           | 0       | 0     |   |
| Thompson                        | 0        | 0     | 0          | 0           | 0     | 0          | 0        | 0       | 0           | 0          | 0        | 0       | 0           | 0                               | 1     | 1         | 1834     | 0     | 0           | 0                   | 0      | 0        | 0     | 0     | 0        | 0          | 0        | 0      | 0           | 0              | 0           | 0       | 0     | 0 |
| Typhi                           | 0        | 0     | 1          | 0           | 1     | 0          | 0        | 3       | 1           | 0          | 2        | 0       | 1           | 1                               | 5     | 0         | 0        | 1935  | 0           | 1                   | 2      | 0        | 0     | 0     | 1        | 0          | 0        | 0      | 0           | 0              | 0           | 0       | 2     | 0 |
| Typhimurium                     | 95       | 0     | 0          | 0           | 0     | 0          | 0        | 0       | 0           | 0          | 1        | 0       | 0           | 0                               | 2     | 2         | 0        | 0     | 1267        | 457                 | 0      | 0        | 0     | 0     | 0        | 0          | 0        | 0      | 0           | 0              | 0           | 0       | 0     | 0 |
| Typhimurium var. 5-             | 40       | 0     | 0          | 0           | 0     | 0          | 0        | 0       | 0           | 0          | 0        | 0       | 0           | 0                               | 2     | 1         | 0        | 0     | 419         | 1317                | 1      | 0        | 0     | 0     | 0        | 0          | 0        | 0      | 0           | 0              | 0           | 0       | 1     | 0 |
| Anatum                          | 0        | 0     | 0          | 0           | 0     | 0          | 0        | 0       | 0           | 0          | 0        | 0       | 0           | 0                               | 0     | 0         | 0        | 0     | 0           | 0                   | 215    | 0        | 0     | 0     | 0        | 0          | 0        | 0      | 0           | 0              | 0           | 0       | 0     | 0 |
| Bareilly                        | 0        | 0     | 0          | 0           | 1     | 0          | 0        | 0       | 0           | 0          | 0        | 0       | 0           | 0                               | 0     | 0         | 0        | 0     | 0           | 0                   | 0      | 162      | 0     | 0     | 0        | 0          | 0        | 0      | 0           | 0              | 0           | 1       | 0     | 0 |
| Berta                           | 0        | 0     | 0          | 0           | 0     | 0          | 0        | 0       | 0           | 0          | 0        | 0       | 0           | 0                               | 0     | 0         | 0        | 0     | 0           | 0                   | 0      | 204      | 0     | 0     | 0        | 1          | 0        | 0      | 0           | 0              | 0           | 0       | 0     | 0 |
| Derby                           | 0        | 0     | 0          | 1           | 0     | 0          | 0        | 0       | 0           | 0          | 0        | 0       | 0           | 0                               | 0     | 0         | 0        | 0     | 0           | 0                   | 0      | 0        | 186   | 0     | 0        | 0          | 0        | 0      | 0           | 0              | 0           | 0       | 0     | 0 |
| Hartford                        | 0        | 0     | 0          | 0           | 0     | 0          | 0        | 1       | 0           | 0          | 0        | 0       | 0           | 0                               | 0     | 0         | 0        | 0     | 0           | 0                   | 0      | 0        | 0     | 0     | 211      | 0          | 0        | 0      | 0           | 0              | 0           | 0       | 0     | 0 |
| Litchfield                      | 0        | 0     | 0          | 1           | 0     | 0          | 0        | 0       | 0           | 0          | 0        | 0       | 0           | 0                               | 0     | 0         | 0        | 0     | 0           | 0                   | 0      | 0        | 0     | 0     | 0        | 229        | 0        | 0      | 0           | 0              | 0           | 0       | 0     |   |
| Mbandaka                        | 0        | 0     | 0          | 0           | 0     | 0          | 0        | 0       | 0           | 0          | 0        | 0       | 0           | 0                               | 0     | 0         | 0        | 0     | 0           | 0                   | 0      | 0        | 0     | 0     | 0        | 0          | 269      | 0      | 0           | 0              | 0           | 0       | 0     |   |
| Panama                          | 0        | 0     | 0          | 0           | 0     | 0          | 0        | 1       | 0           | 0          | 0        | 0       | 0           | 0                               | 0     | 0         | 0        | 0     | 0           | 0                   | 0      | 3        | 0     | 0     | 0        | 0          | 0        | 0      | 205         | 1              | 0           | 0       | 0     |   |
| Paratyphi A                     | 0        | 0     | 0          | 0           | 0     | 0          | 0        | 0       | 0           | 0          | 0        | 0       | 0           | 1                               | 0     | 0         | 0        | 0     | 0           | 0                   | 0      | 0        | 0     | 0     | 0        | 0          | 0        | 0      | 133         | 0              | 0           | 0       | 0     |   |
| Schwarzengrund                  | 0        | 0     | 0          | 0           | 0     | 0          | 0        | 0       | 0           | 0          | 0        | 0       | 0           | 0                               | 0     | 0         | 0        | 0     | 0           | 0                   | 0      | 1        | 0     | 0     | 0        | 0          | 0        | 0      | 0           | 0              | 218         | 0       | 1     | 0 |
| Senftenberg                     | 0        | 0     | 0          | 0           | 0     | 0          | 0        | 0       | 0           | 0          | 0        | 0       | 0           | 0                               | 0     | 0         | 0        | 0     | 0           | 0                   | 0      | 0        | 0     | 0     | 0        | 0          | 0        | 0      | 0           | 0              | 0           | 175     | 0     |   |
| Stanley                         | 0        | 0     | 0          | 0           | 0     | 0          | 0        | 0       | 0           | 0          | 0        | 0       | 0           | 0                               | 0     | 0         | 0        | 0     | 0           | 0                   | 0      | 0        | 0     | 0     | 0        | 0          | 0        | 0      | 0           | 0              | 0           | 0       | 202   | 0 |
| Total                           | 1849     | 1953  | 1850       | 1843        | 1834  | 1923       | 1843     | 1800    | 1812        | 1877       | 1876     | 1825    | 1951        | 1824                            | 1855  | 1894      | 1841     | 1941  | 1841        | 1833                | 222    | 201      | 209   | 212   | 218      | 237        | 270      | 228    | 135         | 225            | 189         | 219     |       |   |
| Average Accuracy                | 92.5%    | 99.9% | 99.8%      | 99.7%       | 99.0% | 99.8%      | 99.8%    | 99.5%   | 99.3%       | 99.6%      | 99.0%    | 99.5%   | 99.4%       | 99.5%                           | 97.5% | 99.3%     | 99.6%    | 99.7% | 68.8%       | 71.8%               | 96.8%  | 80.6%    | 97.8% | 87.7% | 97.0%    | 96.6%      | 99.6%    | 89.7%  | 98.3%       | 96.8%          | 92.4%       | 92.3%   | 96.0% |   |

8  
9  
10

11  
12  
13  
14  
15  
16

Table S1B. Matching/mismatching of SVM classification analysis of 39830 PFGE patterns (including G1 and G2) adjusted by NCTR fixed band method using Group 1 as the standard set of band classes. Two-fold cross validation was used with 100 repetitions.

| Predicted Serotype                 | 4,[5],12:i:- | Agona | Braenderup | Enteritidis | Hadar | Heidelberg | Infantis | Javiana | Mississippi | Montevideo | Muenchen | Newport | Oranienburg | Paratyphi B var. L(+)<br>tartrate+ | Poona | Saintpaul | Thompson | Typhi | Typhimurium | Typhimurium var. 5- | Anatum | Bareilly | Berta | Derby | Hartford | Litchfield | Mbandaka | Panama | Paratyphi A | Schwarzengrund | Senftenberg | Stanley |       |
|------------------------------------|--------------|-------|------------|-------------|-------|------------|----------|---------|-------------|------------|----------|---------|-------------|------------------------------------|-------|-----------|----------|-------|-------------|---------------------|--------|----------|-------|-------|----------|------------|----------|--------|-------------|----------------|-------------|---------|-------|
| 14,[5],12:i:-                      | 1710         | 0     | 0          | 0           | 0     | 0          | 0        | 0       | 0           | 0          | 0        | 0       | 0           | 0                                  | 3     | 0         | 0        | 0     | 156         | 52                  | 0      | 0        | 1     | 0     | 0        | 0          | 0        | 0      | 0           | 0              | 0           | 0       | 1     |
| Agona                              | 0            | 1952  | 0          | 0           | 0     | 0          | 0        | 0       | 0           | 0          | 0        | 0       | 0           | 0                                  | 1     | 2         | 1        | 0     | 0           | 0                   | 1      | 0        | 0     | 7     | 0        | 1          | 1        | 0      | 1           | 0              | 0           | 0       |       |
| Braenderup                         | 0            | 0     | 1843       | 1           | 0     | 0          | 0        | 0       | 0           | 0          | 0        | 0       | 0           | 0                                  | 0     | 0         | 0        | 0     | 0           | 0                   | 0      | 0        | 0     | 0     | 0        | 0          | 0        | 0      | 0           | 0              | 0           | 0       |       |
| Enteritidis                        | 0            | 0     | 0          | 1837        | 0     | 0          | 0        | 0       | 0           | 0          | 0        | 0       | 0           | 0                                  | 2     | 0         | 0        | 0     | 0           | 0                   | 0      | 0        | 0     | 0     | 0        | 1          | 0        | 0      | 0           | 0              | 0           | 0       |       |
| Hadar                              | 1            | 0     | 0          | 0           | 1815  | 0          | 0        | 0       | 0           | 0          | 1        | 1       | 0           | 0                                  | 1     | 0         | 0        | 0     | 0           | 2                   | 1      | 2        | 0     | 0     | 0        | 0          | 0        | 3      | 0           | 1              | 0           | 0       |       |
| Heidelberg                         | 0            | 0     | 0          | 0           | 0     | 1918       | 0        | 0       | 0           | 0          | 0        | 0       | 0           | 0                                  | 0     | 0         | 0        | 0     | 1           | 3                   | 0      | 0        | 0     | 0     | 0        | 0          | 0        | 1      | 0           | 0              | 1           | 0       |       |
| Infantis                           | 0            | 0     | 0          | 0           | 0     | 0          | 1839     | 0       | 1           | 0          | 2        | 2       | 0           | 0                                  | 0     | 0         | 1        | 0     | 0           | 0                   | 2      | 1        | 0     | 0     | 0        | 0          | 0        | 0      | 0           | 0              | 0           | 0       | 0     |
| Javiana                            | 0            | 0     | 0          | 0           | 2     | 0          | 0        | 1793    | 1           | 0          | 0        | 0       | 0           | 0                                  | 2     | 0         | 0        | 0     | 0           | 0                   | 0      | 0        | 0     | 0     | 0        | 0          | 0        | 8      | 0           | 0              | 1           | 0       |       |
| Mississippi                        | 0            | 0     | 1          | 0           | 1     | 2          | 3        | 0       | 1801        | 1          | 1        | 3       | 0           | 0                                  | 4     | 0         | 0        | 1     | 0           | 1                   | 2      | 2        | 2     | 6     | 0        | 2          | 2        | 1      | 0           | 0              | 0           | 0       |       |
| Montevideo                         | 0            | 0     | 0          | 2           | 1     | 0          | 0        | 0       | 0           | 1872       | 0        | 0       | 2           | 2                                  | 0     | 0         | 4        | 0     | 0           | 0                   | 1      | 2        | 0     | 0     | 2        | 0          | 0        | 0      | 0           | 0              | 0           | 0       |       |
| Muenchen                           | 0            | 0     | 1          | 0           | 2     | 0          | 1        | 0       | 0           | 1          | 1867     | 2       | 0           | 1                                  | 1     | 1         | 1        | 0     | 0           | 0                   | 0      | 2        | 0     | 1     | 2        | 0          | 0        | 0      | 0           | 0              | 1           | 0       |       |
| Newport                            | 0            | 0     | 3          | 1           | 2     | 0          | 0        | 1       | 1           | 0          | 0        | 1815    | 0           | 1                                  | 0     | 1         | 0        | 0     | 0           | 0                   | 0      | 1        | 0     | 1     | 1        | 4          | 0        | 0      | 0           | 1              | 0           | 0       |       |
| Oranienburg                        | 0            | 0     | 0          | 0           | 0     | 0          | 0        | 0       | 0           | 0          | 0        | 0       | 1941        | 0                                  | 0     | 0         | 3        | 0     | 0           | 0                   | 0      | 0        | 0     | 0     | 0        | 1          | 0        | 0      | 0           | 0              | 0           | 0       |       |
| Paratyphi B var. L(+)<br>tartrate+ | 0            | 0     | 0          | 0           | 0     | 0          | 0        | 0       | 0           | 1          | 2        | 2       | 1813        | 0                                  | 2     | 0         | 0        | 0     | 0           | 1                   | 0      | 5        | 5     | 2     | 0        | 1          | 0        | 0      | 0           | 0              | 1           | 6       |       |
| Poona                              | 2            | 0     | 1          | 0           | 7     | 2          | 0        | 5       | 4           | 0          | 1        | 1       | 2           | 4                                  | 1834  | 3         | 0        | 1     | 1           | 3                   | 0      | 2        | 0     | 7     | 0        | 3          | 1        | 4      | 0           | 3              | 11          | 2       |       |
| Saintpaul                          | 0            | 0     | 0          | 0           | 1     | 1          | 0        | 0       | 0           | 0          | 0        | 0       | 3           | 0                                  | 0     | 1882      | 0        | 0     | 1           | 1                   | 0      | 2        | 0     | 0     | 0        | 0          | 0        | 1      | 0           | 0              | 0           | 0       |       |
| Thompson                           | 0            | 0     | 0          | 0           | 0     | 0          | 0        | 0       | 0           | 0          | 0        | 0       | 0           | 0                                  | 0     | 0         | 1832     | 0     | 0           | 0                   | 0      | 0        | 0     | 0     | 0        | 0          | 0        | 0      | 0           | 0              | 0           | 0       | 0     |
| Typhi                              | 0            | 0     | 1          | 0           | 1     | 0          | 0        | 0       | 0           | 0          | 2        | 0       | 0           | 0                                  | 4     | 0         | 0        | 0     | 0           | 0                   | 0      | 0        | 0     | 0     | 2        | 0          | 1        | 0      | 0           | 0              | 0           | 0       |       |
| Typhimurium                        | 95           | 0     | 0          | 0           | 0     | 0          | 0        | 0       | 0           | 0          | 0        | 0       | 0           | 0                                  | 1     | 2         | 0        | 0     | 0           | 1247                | 454    | 0        | 0     | 0     | 0        | 0          | 0        | 0      | 0           | 0              | 0           | 0       |       |
| Typhimurium var. 5-                | 41           | 0     | 0          | 0           | 0     | 1          | 0        | 0       | 0           | 0          | 0        | 0       | 0           | 0                                  | 0     | 0         | 0        | 0     | 0           | 435                 | 1316   | 1        | 0     | 0     | 0        | 0          | 0        | 0      | 0           | 0              | 0           | 0       |       |
| Anatum                             | 0            | 0     | 0          | 0           | 1     | 0          | 0        | 0       | 0           | 0          | 0        | 0       | 0           | 0                                  | 0     | 0         | 0        | 0     | 0           | 0                   | 216    | 0        | 0     | 0     | 0        | 0          | 0        | 0      | 0           | 0              | 0           | 0       |       |
| Bareilly                           | 0            | 0     | 0          | 0           | 1     | 0          | 0        | 0       | 0           | 0          | 0        | 0       | 0           | 1                                  | 0     | 0         | 0        | 0     | 0           | 0                   | 0      | 178      | 0     | 1     | 0        | 0          | 0        | 0      | 0           | 1              | 0           | 0       |       |
| Berta                              | 0            | 0     | 0          | 0           | 0     | 0          | 0        | 0       | 0           | 0          | 0        | 0       | 0           | 0                                  | 0     | 0         | 0        | 0     | 0           | 0                   | 0      | 200      | 0     | 0     | 0        | 0          | 0        | 0      | 0           | 0              | 0           | 0       |       |
| Derby                              | 0            | 0     | 0          | 0           | 0     | 0          | 0        | 0       | 0           | 0          | 0        | 0       | 0           | 0                                  | 1     | 0         | 0        | 0     | 0           | 0                   | 0      | 0        | 0     | 187   | 0        | 0          | 0        | 0      | 0           | 0              | 0           | 0       |       |
| Hartford                           | 0            | 0     | 0          | 0           | 0     | 0          | 0        | 0       | 0           | 0          | 0        | 0       | 0           | 0                                  | 0     | 0         | 0        | 0     | 0           | 0                   | 0      | 0        | 0     | 0     | 210      | 0          | 0        | 0      | 0           | 0              | 0           | 0       |       |
| Litchfield                         | 0            | 0     | 0          | 0           | 0     | 0          | 0        | 0       | 0           | 0          | 0        | 0       | 0           | 0                                  | 0     | 0         | 0        | 0     | 0           | 0                   | 0      | 0        | 0     | 0     | 0        | 224        | 0        | 0      | 0           | 0              | 0           | 0       |       |
| Mbandaka                           | 0            | 0     | 0          | 0           | 0     | 0          | 0        | 0       | 0           | 0          | 0        | 0       | 0           | 0                                  | 0     | 0         | 0        | 0     | 0           | 0                   | 0      | 0        | 0     | 0     | 0        | 0          | 266      | 0      | 0           | 0              | 0           | 0       |       |
| Panama                             | 0            | 0     | 0          | 0           | 0     | 0          | 0        | 1       | 0           | 0          | 0        | 0       | 0           | 0                                  | 0     | 1         | 0        | 0     | 0           | 0                   | 0      | 1        | 0     | 0     | 0        | 0          | 0        | 209    | 1           | 0              | 0           | 0       |       |
| Paratyphi A                        | 0            | 0     | 0          | 0           | 0     | 0          | 0        | 0       | 0           | 0          | 0        | 0       | 0           | 1                                  | 0     | 0         | 0        | 0     | 0           | 0                   | 0      | 0        | 0     | 0     | 0        | 0          | 0        | 0      | 132         | 0              | 0           | 0       |       |
| Schwarzengrund                     | 0            | 0     | 0          | 0           | 0     | 0          | 0        | 0       | 0           | 0          | 0        | 0       | 0           | 0                                  | 0     | 0         | 0        | 0     | 0           | 0                   | 0      | 0        | 0     | 0     | 0        | 0          | 0        | 0      | 0           | 218            | 0           | 0       |       |
| Senftenberg                        | 0            | 0     | 0          | 0           | 0     | 0          | 0        | 0       | 0           | 0          | 0        | 0       | 0           | 0                                  | 0     | 0         | 0        | 0     | 0           | 0                   | 0      | 0        | 0     | 0     | 0        | 0          | 0        | 0      | 0           | 0              | 174         | 0       |       |
| Stanley                            | 0            | 0     | 0          | 0           | 0     | 0          | 0        | 0       | 0           | 0          | 0        | 0       | 0           | 1                                  | 0     | 0         | 0        | 0     | 0           | 0                   | 0      | 0        | 0     | 0     | 0        | 0          | 0        | 0      | 0           | 0              | 0           | 210     |       |
| Total                              | 1849         | 1953  | 1850       | 1843        | 1834  | 1923       | 1843     | 1800    | 1812        | 1877       | 1876     | 1825    | 1951        | 1824                               | 1855  | 1894      | 1841     | 1941  | 1841        | 1833                | 222    | 201      | 209   | 212   | 218      | 237        | 270      | 228    | 135         | 225            | 189         | 219     |       |
| Average accuracy                   | 92.5%        | ##### | 99.6%      | 99.7%       | 98.9% | 99.7%      | 99.8%    | 99.6%   | 99.4%       | 99.7%      | 99.5%    | 99.4%   | 99.5%       | 99.4%                              | 98.9% | 99.4%     | 99.5%    | 99.9% | 67.8%       | 71.8%               | 97.4%  | 88.7%    | 95.9% | 88.1% | 96.2%    | 94.5%      | 98.5%    | 91.8%  | 98.1%       | 96.8%          | 91.9%       | 95.7%   | 96.1% |

17 Supplemental Data:

18

19 Table S2A: The detail matching/mismatching of further validation on additional 6,093 PFGE patterns (Group 3) by RF classification  
20 algorithm.

21

22

| Predicted Serotype              | 4,[5],12:i:- | Braenderup | Enteritidis | Hadar | Heidelberg | Infantis | Javiana | Mississippi | Montevideo | Muenchen | Newport | Paratyphi B var. L(+) tartrate+ | Poona | Saintpaul | Thompson | Typhimurium var. 5- | Typhimurium var | Anatum | Bareilly | Berta | Derby | Hartford | Litchfield | Mbandaka | Panama | Stanley |       |
|---------------------------------|--------------|------------|-------------|-------|------------|----------|---------|-------------|------------|----------|---------|---------------------------------|-------|-----------|----------|---------------------|-----------------|--------|----------|-------|-------|----------|------------|----------|--------|---------|-------|
| I 4,[5],12:i:-                  | 403          | 0          | 0           | 0     | 0          | 0        | 0       | 0           | 0          | 0        | 0       | 0                               | 0     | 0         | 0        | 18                  | 14              | 0      | 0        | 0     | 0     | 0        | 0          | 0        | 0      | 0       | 0     |
| Agona                           | 0            | 0          | 0           | 0     | 0          | 0        | 0       | 0           | 0          | 0        | 1       | 0                               | 0     | 0         | 0        | 0                   | 0               | 0      | 3        | 0     | 6     | 0        | 0          | 1        | 0      | 0       |       |
| Braenderup                      | 0            | 158        | 0           | 0     | 0          | 0        | 0       | 0           | 0          | 0        | 0       | 0                               | 0     | 0         | 0        | 0                   | 1               | 0      | 0        | 4     | 0     | 0        | 0          | 0        | 0      | 0       |       |
| Enteritidis                     | 0            | 0          | 494         | 0     | 0          | 0        | 0       | 0           | 0          | 0        | 0       | 0                               | 0     | 0         | 0        | 0                   | 0               | 0      | 0        | 1     | 0     | 0        | 0          | 0        | 0      | 0       |       |
| Hadar                           | 0            | 0          | 0           | 145   | 0          | 0        | 0       | 0           | 0          | 0        | 1       | 0                               | 0     | 0         | 0        | 0                   | 2               | 1      | 9        | 1     | 0     | 0        | 0          | 0        | 0      | 0       |       |
| Heidelberg                      | 0            | 0          | 0           | 0     | 191        | 0        | 0       | 0           | 0          | 0        | 0       | 0                               | 0     | 0         | 0        | 1                   | 1               | 2      | 0        | 0     | 0     | 0        | 0          | 0        | 0      | 0       |       |
| Infantis                        | 1            | 0          | 0           | 0     | 0          | 235      | 0       | 0           | 0          | 0        | 0       | 0                               | 0     | 0         | 0        | 0                   | 1               | 0      | 2        | 0     | 3     | 0        | 0          | 0        | 0      | 0       |       |
| Javiana                         | 0            | 0          | 0           | 0     | 0          | 0        | 298     | 0           | 0          | 0        | 0       | 0                               | 1     | 0         | 0        | 0                   | 0               | 0      | 1        | 0     | 0     | 0        | 0          | 0        | 14     | 0       |       |
| Mississippi                     | 0            | 0          | 0           | 1     | 0          | 0        | 0       | 184         | 0          | 0        | 1       | 0                               | 0     | 0         | 0        | 0                   | 0               | 1      | 2        | 2     | 0     | 1        | 0          | 0        | 0      | 0       |       |
| Montevideo                      | 0            | 0          | 0           | 0     | 0          | 0        | 0       | 0           | 163        | 0        | 0       | 0                               | 0     | 0         | 0        | 0                   | 0               | 0      | 0        | 0     | 1     | 0        | 0          | 0        | 0      | 2       |       |
| Muenchen                        | 1            | 0          | 0           | 0     | 0          | 0        | 0       | 1           | 0          | 93       | 1       | 0                               | 0     | 1         | 0        | 0                   | 0               | 0      | 3        | 0     | 3     | 0        | 0          | 0        | 2      | 0       |       |
| Newport                         | 0            | 0          | 0           | 1     | 0          | 0        | 2       | 1           | 0          | 0        | 172     | 0                               | 0     | 1         | 0        | 0                   | 0               | 1      | 1        | 1     | 0     | 0        | 1          | 0        | 0      | 2       |       |
| Oranienburg                     | 0            | 0          | 0           | 0     | 0          | 0        | 0       | 0           | 0          | 0        | 0       | 0                               | 0     | 0         | 0        | 0                   | 0               | 0      | 1        | 0     | 2     | 0        | 0          | 0        | 0      | 0       |       |
| Paratyphi B var. L(+) tartrate+ | 1            | 0          | 0           | 0     | 0          | 0        | 0       | 0           | 0          | 1        | 4       | 187                             | 0     | 0         | 0        | 1                   | 1               | 1      | 2        | 3     | 0     | 0        | 1          | 0        | 0      | 11      |       |
| Poona                           | 0            | 0          | 0           | 0     | 0          | 0        | 2       | 0           | 0          | 0        | 0       | 0                               | 99    | 0         | 0        | 0                   | 0               | 0      | 0        | 1     | 1     | 0        | 0          | 0        | 4      | 0       |       |
| Saintpaul                       | 1            | 0          | 1           | 0     | 0          | 0        | 0       | 0           | 0          | 0        | 0       | 0                               | 0     | 356       | 0        | 1                   | 0               | 0      | 1        | 0     | 0     | 0        | 0          | 0        | 0      | 1       |       |
| Thompson                        | 0            | 0          | 0           | 0     | 0          | 0        | 0       | 0           | 0          | 0        | 0       | 0                               | 1     | 0         | 204      | 0                   | 0               | 1      | 0        | 0     | 0     | 0        | 0          | 0        | 0      | 1       |       |
| Typhi                           | 0            | 0          | 0           | 0     | 0          | 0        | 0       | 1           | 0          | 0        | 0       | 0                               | 0     | 0         | 0        | 0                   | 0               | 0      | 0        | 0     | 1     | 4        | 0          | 0        | 0      | 0       |       |
| Typhimurium                     | 15           | 0          | 0           | 0     | 0          | 0        | 0       | 0           | 0          | 0        | 0       | 0                               | 0     | 0         | 0        | 139                 | 66              | 0      | 0        | 0     | 0     | 0        | 0          | 0        | 0      | 0       |       |
| Typhimurium var. 5-             | 9            | 0          | 0           | 0     | 0          | 0        | 0       | 0           | 0          | 0        | 0       | 0                               | 0     | 0         | 0        | 62                  | 227             | 0      | 0        | 0     | 0     | 0        | 0          | 0        | 0      | 0       |       |
| Anatum                          | 0            | 0          | 0           | 0     | 0          | 0        | 0       | 0           | 0          | 0        | 0       | 0                               | 0     | 0         | 0        | 0                   | 0               | 250    | 0        | 0     | 0     | 0        | 0          | 0        | 0      | 0       |       |
| Bareilly                        | 0            | 0          | 0           | 0     | 0          | 0        | 0       | 0           | 0          | 0        | 0       | 0                               | 0     | 0         | 0        | 1                   | 0               | 0      | 201      | 0     | 0     | 1        | 0          | 0        | 1      | 0       |       |
| Berta                           | 0            | 0          | 0           | 0     | 0          | 0        | 0       | 0           | 0          | 0        | 0       | 0                               | 0     | 0         | 0        | 0                   | 0               | 0      | 0        | 279   | 0     | 0        | 0          | 0        | 0      | 0       |       |
| Derby                           | 0            | 0          | 0           | 0     | 0          | 0        | 0       | 0           | 0          | 0        | 0       | 0                               | 0     | 0         | 0        | 0                   | 0               | 0      | 0        | 0     | 163   | 0        | 0          | 0        | 0      | 0       |       |
| Hartford                        | 0            | 0          | 0           | 0     | 0          | 0        | 0       | 0           | 0          | 0        | 0       | 0                               | 0     | 0         | 0        | 0                   | 0               | 0      | 0        | 0     | 0     | 307      | 0          | 0        | 0      | 0       |       |
| Litchfield                      | 0            | 0          | 0           | 0     | 0          | 0        | 0       | 0           | 1          | 0        | 0       | 0                               | 0     | 0         | 0        | 0                   | 0               | 0      | 0        | 1     | 1     | 0        | 162        | 0        | 0      | 0       |       |
| Mbandaka                        | 0            | 0          | 0           | 0     | 0          | 0        | 0       | 0           | 0          | 0        | 0       | 0                               | 0     | 0         | 0        | 0                   | 0               | 0      | 0        | 0     | 0     | 0        | 0          | 161      | 0      | 0       |       |
| Panama                          | 0            | 0          | 0           | 0     | 0          | 0        | 0       | 0           | 0          | 0        | 0       | 0                               | 0     | 0         | 0        | 0                   | 0               | 0      | 0        | 0     | 0     | 0        | 0          | 0        | 267    | 0       |       |
| Stanley                         | 0            | 0          | 0           | 0     | 0          | 0        | 0       | 0           | 0          | 0        | 0       | 0                               | 0     | 0         | 0        | 0                   | 0               | 0      | 0        | 0     | 0     | 0        | 0          | 0        | 0      | 224     |       |
| Total                           | 431          | 158        | 495         | 147   | 191        | 235      | 302     | 187         | 164        | 94       | 180     | 187                             | 101   | 358       | 204      | 223                 | 313             | 256    | 225      | 293   | 181   | 313      | 164        | 162      | 288    | 241     |       |
| Accuracy                        | 93.5%        | 100.0%     | 99.8%       | 98.6% | 100.0%     | 100.0%   | 98.7%   | 98.4%       | 99.4%      | 98.9%    | 95.6%   | 100.0%                          | 98.0% | 99.4%     | 100.0%   | 62.3%               | 72.5%           | 97.3%  | 88.9%    | 95.2% | 90.1% | 98.1%    | 98.8%      | 99.4%    | 92.7%  | 92.9%   | 94.5% |

23

24

25

26 Table S2B: The detail matching/mismatching of further validation on additional 6,093 PFGE patterns (Group 3) by SVMclassification  
 27 algorithm.  
 28  
 29

| Predicted Serotype                 | 4,[5],12:i- | Braenderup | Enteritidis | Hadar | Heidelberg | Infantis | Javiana | Mississippi | Montevideo | Muenchen | Newport | Paratyphi B var. L(+)<br>tartrate+ | Poona  | Saintpaul | Thompson | Typhimurium var. 5- | Typhimurium var | Anatum | Bareilly | Berta | Derby | Hartford | Litchfield | Mbandaka | Panama | Stanley |       |
|------------------------------------|-------------|------------|-------------|-------|------------|----------|---------|-------------|------------|----------|---------|------------------------------------|--------|-----------|----------|---------------------|-----------------|--------|----------|-------|-------|----------|------------|----------|--------|---------|-------|
| 4,[5],12:i-                        | 405         | 0          | 0           | 0     | 0          | 0        | 0       | 0           | 0          | 0        | 0       | 0                                  | 0      | 0         | 0        | 22                  | 19              | 0      | 0        | 0     | 0     | 0        | 0          | 0        | 0      | 0       | 0     |
| Agona                              | 0           | 0          | 0           | 0     | 0          | 0        | 0       | 0           | 0          | 0        | 1       | 0                                  | 0      | 0         | 0        | 0                   | 0               | 0      | 0        | 0     | 6     | 0        | 0          | 0        | 0      | 0       | 0     |
| Braenderup                         | 0           | 158        | 0           | 0     | 0          | 0        | 0       | 0           | 0          | 0        | 0       | 0                                  | 0      | 0         | 0        | 0                   | 0               | 0      | 0        | 0     | 0     | 0        | 0          | 0        | 0      | 0       | 0     |
| Enteritidis                        | 0           | 0          | 494         | 0     | 0          | 0        | 0       | 0           | 0          | 0        | 0       | 0                                  | 0      | 0         | 0        | 0                   | 0               | 0      | 0        | 1     | 0     | 0        | 0          | 0        | 0      | 0       | 0     |
| Hadar                              | 1           | 0          | 0           | 145   | 0          | 0        | 0       | 0           | 0          | 0        | 1       | 0                                  | 0      | 0         | 0        | 0                   | 3               | 1      | 2        | 0     | 0     | 1        | 0          | 0        | 0      | 0       | 0     |
| Heidelberg                         | 0           | 0          | 0           | 0     | 191        | 0        | 0       | 0           | 0          | 0        | 0       | 0                                  | 0      | 0         | 0        | 0                   | 2               | 0      | 0        | 0     | 0     | 0        | 0          | 0        | 0      | 0       | 0     |
| Infantis                           | 0           | 0          | 0           | 0     | 0          | 234      | 0       | 0           | 0          | 0        | 0       | 0                                  | 0      | 0         | 0        | 0                   | 0               | 0      | 1        | 0     | 2     | 0        | 0          | 0        | 0      | 0       | 0     |
| Javiana                            | 0           | 0          | 0           | 0     | 0          | 0        | 300     | 0           | 0          | 0        | 0       | 0                                  | 0      | 0         | 0        | 0                   | 0               | 0      | 0        | 1     | 0     | 0        | 0          | 0        | 11     | 0       |       |
| Mississippi                        | 0           | 0          | 0           | 0     | 0          | 1        | 0       | 185         | 0          | 0        | 0       | 0                                  | 0      | 0         | 0        | 0                   | 0               | 0      | 3        | 4     | 0     | 0        | 0          | 0        | 0      | 0       | 1     |
| Montevideo                         | 0           | 0          | 0           | 0     | 0          | 0        | 0       | 0           | 163        | 0        | 0       | 0                                  | 0      | 0         | 0        | 0                   | 0               | 0      | 1        | 0     | 0     | 0        | 0          | 1        | 0      | 0       |       |
| Muenchen                           | 0           | 0          | 0           | 0     | 0          | 0        | 0       | 0           | 0          | 93       | 0       | 0                                  | 0      | 2         | 1        | 0                   | 0               | 0      | 2        | 0     | 2     | 0        | 0          | 0        | 2      | 0       |       |
| Newport                            | 0           | 0          | 0           | 1     | 0          | 0        | 0       | 0           | 0          | 0        | 175     | 0                                  | 0      | 0         | 0        | 0                   | 0               | 0      | 0        | 0     | 0     | 0        | 0          | 0        | 0      | 1       | 1     |
| Oranienburg                        | 0           | 0          | 0           | 0     | 0          | 0        | 0       | 0           | 0          | 0        | 0       | 1                                  | 0      | 0         | 1        | 0                   | 0               | 0      | 0        | 0     | 0     | 0        | 0          | 0        | 0      | 0       | 0     |
| Paratyphi B var. L(+)<br>tartrate+ | 1           | 0          | 0           | 0     | 0          | 0        | 0       | 0           | 0          | 1        | 2       | 186                                | 0      | 0         | 0        | 0                   | 1               | 2      | 2        | 1     | 1     | 0        | 1          | 0        | 0      | 3       |       |
| Poona                              | 0           | 0          | 0           | 1     | 0          | 0        | 2       | 2           | 0          | 0        | 1       | 0                                  | 101    | 0         | 0        | 0                   | 0               | 1      | 1        | 0     | 3     | 0        | 0          | 0        | 0      | 6       |       |
| Saintpaul                          | 1           | 0          | 0           | 0     | 0          | 0        | 0       | 0           | 0          | 0        | 0       | 0                                  | 0      | 356       | 0        | 0                   | 0               | 0      | 0        | 0     | 1     | 0        | 0          | 0        | 0      | 0       |       |
| Thompson                           | 0           | 0          | 0           | 0     | 0          | 0        | 0       | 0           | 0          | 0        | 0       | 0                                  | 0      | 0         | 202      | 0                   | 0               | 0      | 0        | 0     | 0     | 0        | 0          | 0        | 0      | 0       |       |
| Typhi                              | 0           | 0          | 0           | 0     | 0          | 0        | 0       | 0           | 0          | 0        | 0       | 0                                  | 0      | 0         | 0        | 0                   | 0               | 0      | 0        | 0     | 0     | 1        | 0          | 0        | 0      | 1       |       |
| Typhimurium                        | 15          | 0          | 0           | 0     | 0          | 0        | 0       | 0           | 0          | 0        | 0       | 0                                  | 0      | 0         | 0        | 141                 | 69              | 0      | 0        | 0     | 0     | 0        | 0          | 0        | 0      | 0       |       |
| Typhimurium var. 5-                | 8           | 0          | 0           | 0     | 0          | 0        | 0       | 0           | 0          | 0        | 0       | 0                                  | 0      | 0         | 0        | 60                  | 219             | 0      | 0        | 0     | 0     | 0        | 0          | 0        | 0      | 0       |       |
| Anatum                             | 0           | 0          | 0           | 0     | 0          | 0        | 0       | 0           | 0          | 0        | 0       | 0                                  | 0      | 0         | 0        | 0                   | 0               | 253    | 0        | 0     | 0     | 0        | 0          | 0        | 0      | 0       |       |
| Bareilly                           | 0           | 0          | 1           | 0     | 0          | 0        | 0       | 0           | 1          | 0        | 0       | 0                                  | 0      | 0         | 0        | 0                   | 0               | 0      | 212      | 0     | 1     | 1        | 0          | 0        | 3      | 0       |       |
| Berta                              | 0           | 0          | 0           | 0     | 0          | 0        | 0       | 0           | 0          | 0        | 0       | 0                                  | 0      | 0         | 0        | 0                   | 0               | 0      | 0        | 286   | 0     | 0        | 0          | 0        | 0      | 0       |       |
| Derby                              | 0           | 0          | 0           | 0     | 0          | 0        | 0       | 0           | 0          | 0        | 0       | 0                                  | 0      | 0         | 0        | 0                   | 0               | 0      | 0        | 0     | 165   | 0        | 0          | 0        | 0      | 0       |       |
| Hartford                           | 0           | 0          | 0           | 0     | 0          | 0        | 0       | 0           | 0          | 0        | 0       | 0                                  | 0      | 0         | 0        | 0                   | 0               | 0      | 0        | 0     | 0     | 310      | 0          | 0        | 0      | 0       |       |
| Litchfield                         | 0           | 0          | 0           | 0     | 0          | 0        | 0       | 0           | 0          | 0        | 0       | 0                                  | 0      | 0         | 0        | 0                   | 0               | 0      | 0        | 0     | 0     | 0        | 163        | 0        | 0      | 0       |       |
| Mbandaka                           | 0           | 0          | 0           | 0     | 0          | 0        | 0       | 0           | 0          | 0        | 0       | 0                                  | 0      | 0         | 0        | 0                   | 0               | 0      | 0        | 0     | 0     | 0        | 0          | 161      | 0      | 0       |       |
| Panama                             | 0           | 0          | 0           | 0     | 0          | 0        | 0       | 0           | 0          | 0        | 0       | 0                                  | 0      | 0         | 0        | 0                   | 0               | 0      | 1        | 0     | 0     | 0        | 0          | 0        | 271    | 0       |       |
| Senftenberg                        | 0           | 0          | 0           | 0     | 0          | 0        | 0       | 0           | 0          | 0        | 0       | 0                                  | 0      | 0         | 0        | 0                   | 0               | 0      | 1        | 0     | 0     | 0        | 0          | 0        | 0      | 0       |       |
| Stanley                            | 0           | 0          | 0           | 0     | 0          | 0        | 0       | 0           | 0          | 0        | 0       | 0                                  | 0      | 0         | 0        | 0                   | 0               | 0      | 0        | 0     | 0     | 0        | 0          | 0        | 0      | 229     |       |
| Total                              | 431         | 158        | 495         | 147   | 191        | 235      | 302     | 187         | 164        | 94       | 180     | 187                                | 101    | 358       | 204      | 223                 | 313             | 256    | 225      | 293   | 181   | 313      | 164        | 162      | 288    | 241     |       |
| Accuracy                           | 94.0%       | 100.0%     | 99.8%       | 98.6% | 100.0%     | 99.6%    | 99.3%   | 98.9%       | 99.4%      | 98.9%    | 97.2%   | 99.5%                              | 100.0% | 99.4%     | 99.0%    | 63.2%               | 70.0%           | 98.4%  | 93.8%    | 97.6% | 91.2% | 99.0%    | 99.4%      | 99.4%    | 94.1%  | 95.0%   | 95.1% |

30  
 31  
 32
